# Supplementary figures and images for: ABCB11 accumulated in immature tertiary lymphoid structures participates in xenobiotic metabolic process and predicts resistance to PD-1/PD-L1 inhibitors in head and neck squamous cell carcinoma
Source: PubMed Central journal article supplement — Transl Oncol. 2023 Jul 28;36:101747. doi: 10.1016/j.tranon.2023.101747 (PMC10407442; doi:10.1016/j.tranon.2023.101747), 2023-07-28

FIG 5D

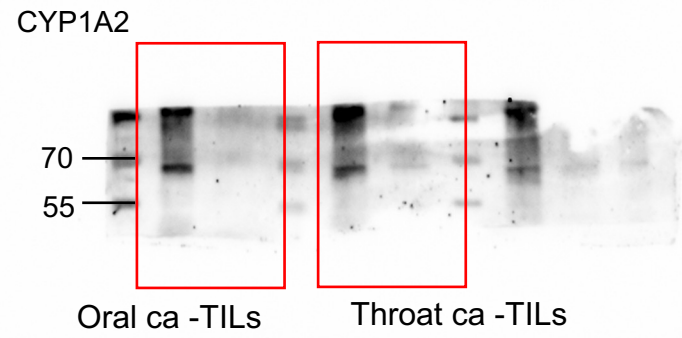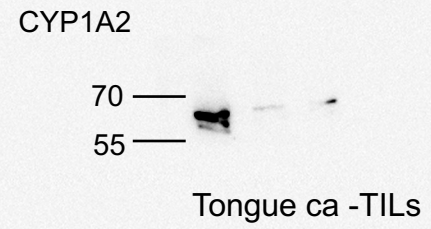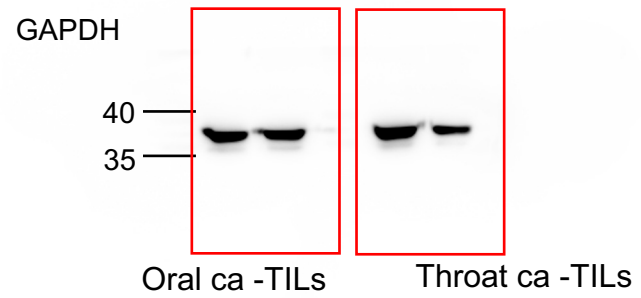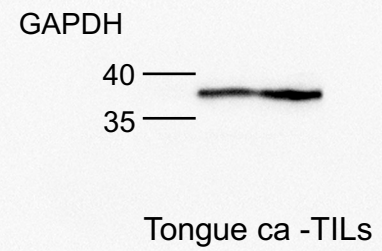

Supplement: mmc2.pdf [file mmc2.pdf]
